# Supplementary material for: Isolation and characterization of novel Staphylococcus aureus bacteriophage Hesat from dairy origin
Source: Springer Nature journal article supplement (doi:10.1007/s00253-024-13129-y), 2024-04-15
Supplement: MOESM1 [file 253_2024_13129_MOESM1_ESM.pdf]

**Isolation and characterization of novel *Staphylococcus aureus* bacteriophage Hesat from dairy origin**

Barbara Turchi<sup>a,\*,#</sup>, Claudia Campobasso<sup>b, c,#</sup>, Arianna Nardinocchi<sup>b</sup>, Jeroen Wagemans<sup>c</sup>, Beatrice Torracca<sup>a</sup>, Cédric Lood<sup>c,d</sup>, Graziano Di Giuseppe<sup>b</sup>, Paola Nieri<sup>c</sup>, Fabrizio Bertelloni<sup>a</sup>, Luca Turini<sup>a</sup>, Valeria Ruffo<sup>a</sup>, Rob Lavigne<sup>c</sup>, Mariagrazia Di Luca<sup>b</sup>

<sup>a</sup>Department of Veterinary Science, University of Pisa, Viale Delle Piagge 2, 56124 Pisa, Italy

<sup>b</sup>Department of Biology, University of Pisa, Via San Zeno 37, 56127 Pisa, Italy

<sup>c</sup>Department of Biosystems, KU Leuven, Kasteelpark Arenberg 21, box 2462, 3001 Leuven, Belgium

<sup>d</sup>Department of Microbial and Molecular Systems, Centre for Microbial and Plant Genetics, KU Leuven, Kasteelpark Arenberg 20, box 2460, 3001 Leuven, Belgium<sup>e</sup>

Department of Pharmacy, University of Pisa, Via Bonanno Pisano 6, 56126 Pisa, Italy

\*Corresponding author: mariagrazia.diluca@unipi.it, Department of Biology, Via San Zeno 37, 56127 (Pisa), Italy, phone: +390502213697

# Equally contributed

**Supplementary figures**

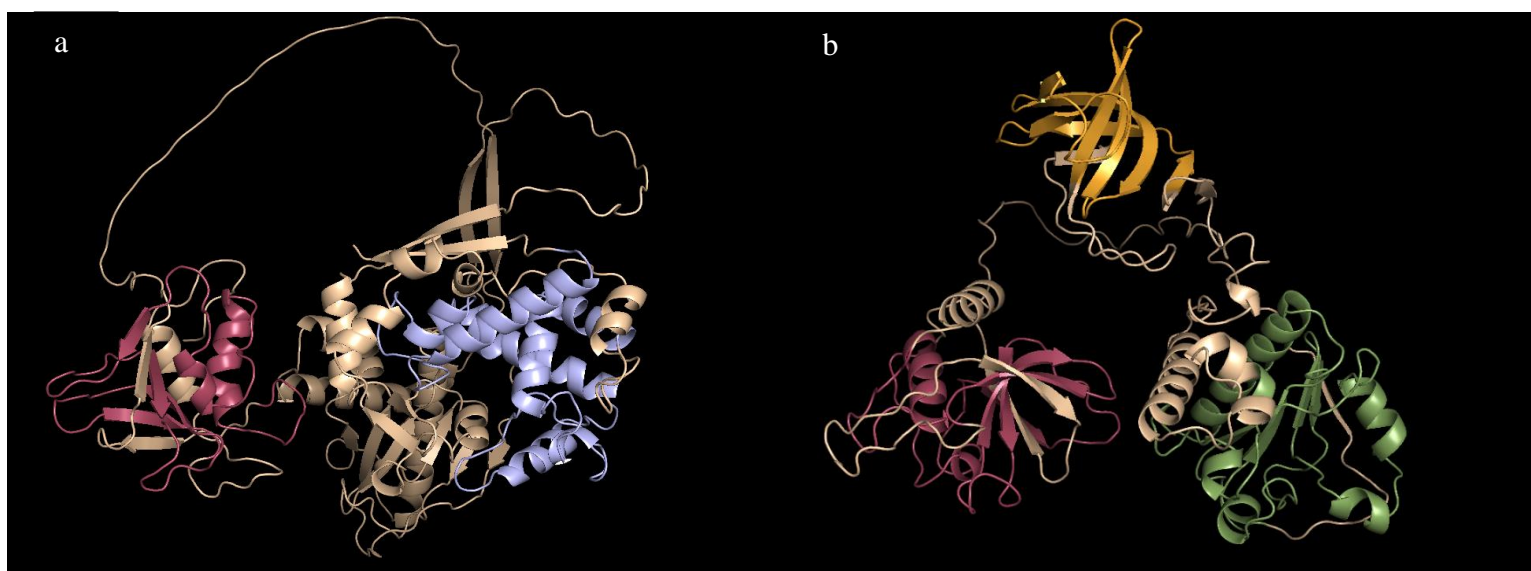

**Fig. S1** Tridimensional structure of the endolysins a) *gp67* and b) *gp71*, predicted by ColabFold. The backbones are displayed in beige while the functional domains are highlighted as follows: in pink the CHAP domains, in purple the glucosamidase, in green the amidase and in yellow the SH3\_5 domain.

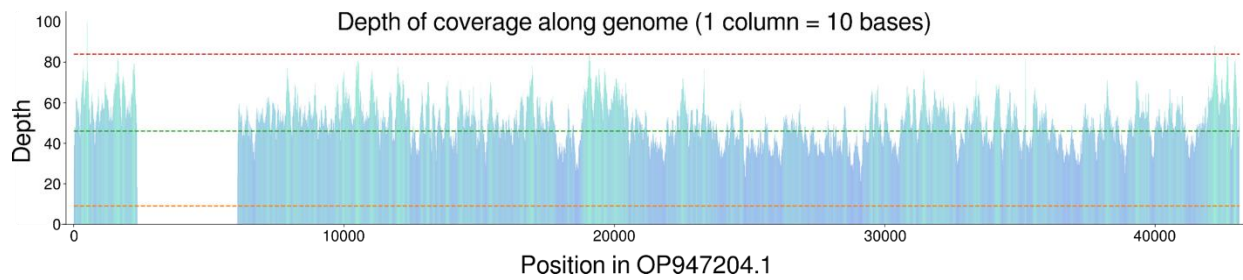

**Fig. S2** Mapping of the reads from the *S. aureus* 916 strain sequencing against the phage Hesat genome reveals a coverage of about 40× all along the phage genome, besides the 3.7 kbp recombined region that is uniquely found in the temperate phage

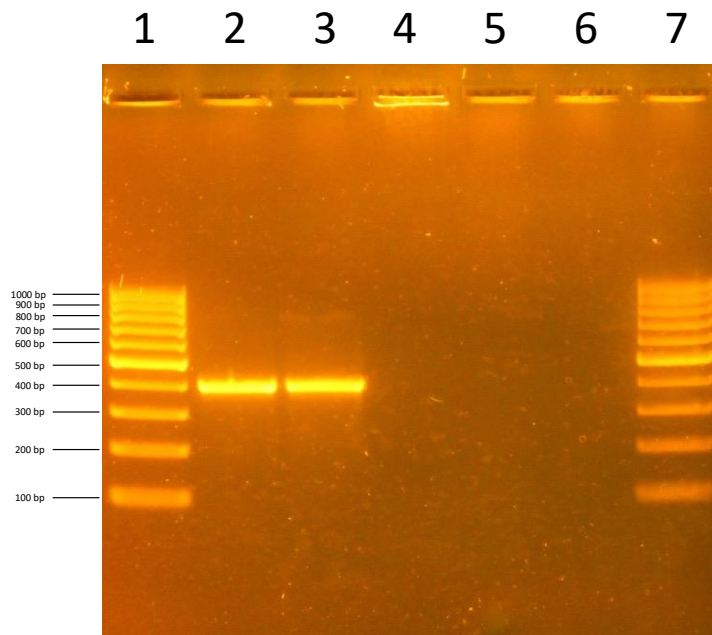

**Fig. S3** Agarose gel electrophoresis (2% agarose) of the PCR product of the 405 bp fragment amplification: lane 2 and 3, two samples of phage Hesat lysate, lane 4 *S. aureus* 916 strain glycerol stock, lanes 5 and 6 two samples of the bacterial genome DNA. In the lanes 1 and 7 the GeneRuler 1kb DNA ladder
